# Supplementary material for: Trends in utilization of neoadjuvant and adjuvant chemotherapy for muscle invasive bladder cancer
Source: PubMed Central journal article supplement — Investig Clin Urol. 2020 Sep 8;61(6):565–72. doi: 10.4111/icu.20200132 (PMC7606117; doi:10.4111/icu.20200132), 2020-09-08
Supplement: icu-61-565-s001.pdf [file icu-61-565-s001.pdf]

**Supplementary Table 1.** Logistic regression for any chemotherapy use, all factors included

| Variable                           | OR    | 95% CI low | 95% CI high | p-value |
|------------------------------------|-------|------------|-------------|---------|
| Mean age (<50 ref.) (y)            |       |            |             |         |
| 51–60                              | 0.825 | 0.617      | 1.103       | 0.194   |
| 61–70                              | 0.682 | 0.513      | 0.906       | 0.008   |
| >70                                | 0.283 | 0.211      | 0.378       | <0.001  |
| Male (sex)                         | 1.087 | 0.972      | 1.217       | 0.145   |
| Race (white ref.)                  |       |            |             |         |
| Black                              | 1.035 | 0.835      | 1.283       | 0.755   |
| Other                              | 0.976 | 0.727      | 1.308       | 0.869   |
| CCI (0 ref.)                       |       |            |             |         |
| 1                                  | 0.852 | 0.758      | 0.958       | 0.008   |
| 2                                  | 0.644 | 0.526      | 0.787       | <0.001  |
| 3+                                 | 0.592 | 0.414      | 0.845       | 0.004   |
| cT Stage (cT2 ref.)                |       |            |             |         |
| 3                                  | 1.440 | 1.231      | 1.686       | <0.001  |
| 4                                  | 1.487 | 1.260      | 1.754       | <0.001  |
| Income status (<\$38,000 ref.)     |       |            |             |         |
| \$38,000–47,999                    | 1.077 | 0.918      | 1.263       | 0.365   |
| \$48,000–62,999                    | 1.217 | 1.039      | 1.425       | 0.015   |
| ≥\$63,000                          | 1.352 | 1.154      | 1.583       | <0.001  |
| Low volume facility                | 1.087 | 0.945      | 1.250       | 0.242   |
| Geographic location (Eastern ref.) |       |            |             |         |
| Central                            | 0.903 | 0.810      | 1.006       | 0.065   |
| Western                            | 0.904 | 0.783      | 1.043       | 0.167   |
| Insurance status (uninsured ref.)  |       |            |             |         |
| Private                            | 1.566 | 1.105      | 2.220       | 0.012   |
| Medicaid                           | 1.328 | 0.889      | 1.984       | 0.166   |
| Medicare                           | 1.346 | 0.945      | 1.917       | 0.100   |
| Other govt or unknown              | 2.380 | 1.486      | 3.813       | <0.001  |

OR, odds ratio; CI, confidence interval; Ref., reference; CCI, Charlson Comorbidity Index; Govt, government.
